# Supplementary material
Source: MDPI journal article supplement (https://www.mdpi.com/2673-1924/5/2/16)

Figure S2. Genic frequencies for the 32 populations at the 6 intron markers

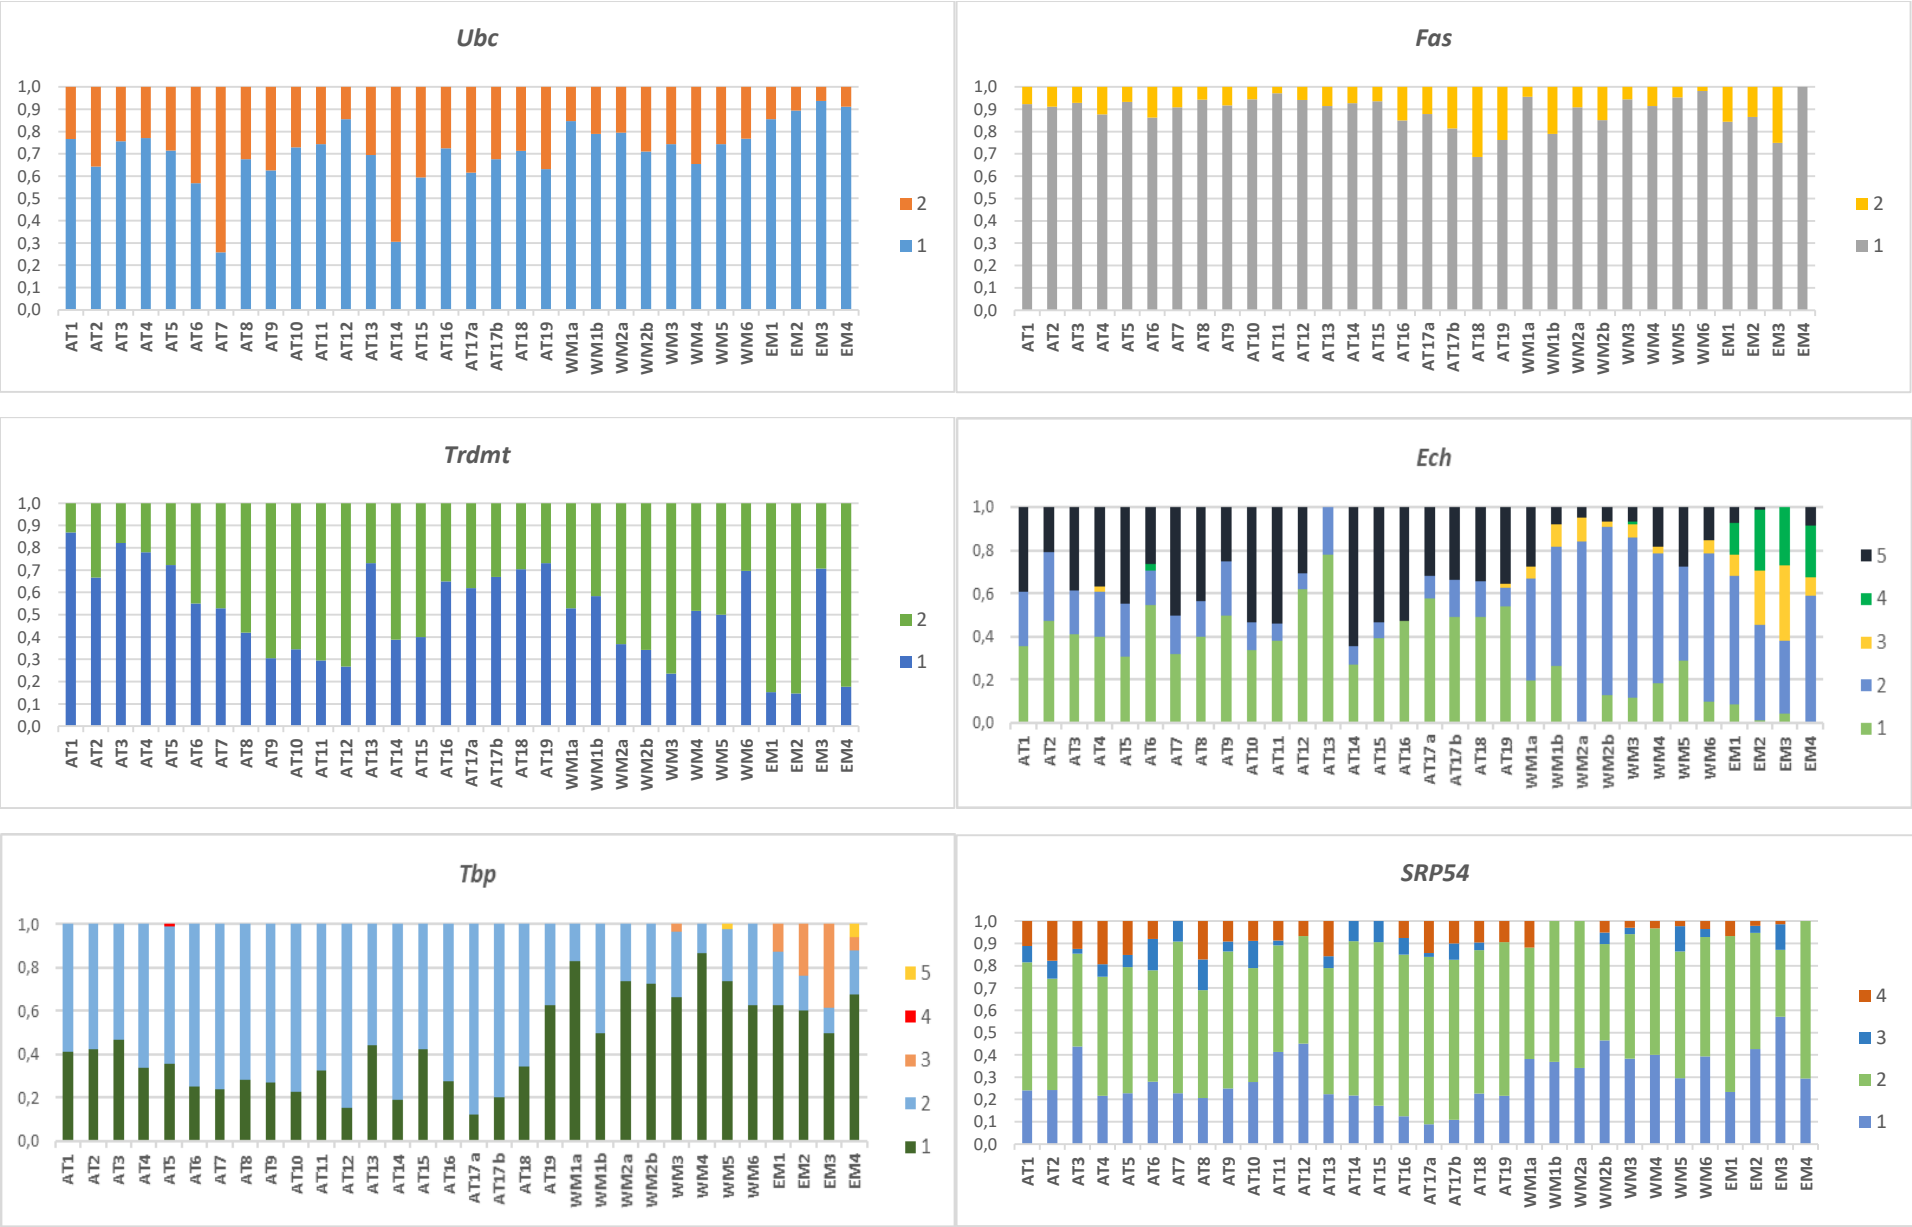

**Figure S3.** Contribution of alleles at each locus to the clusters of the Bayesian analysis of genetic structure, represented as the absolute value of the difference in allelic frequency between clusters. **(a)** K= 2. **(b)** K=6.

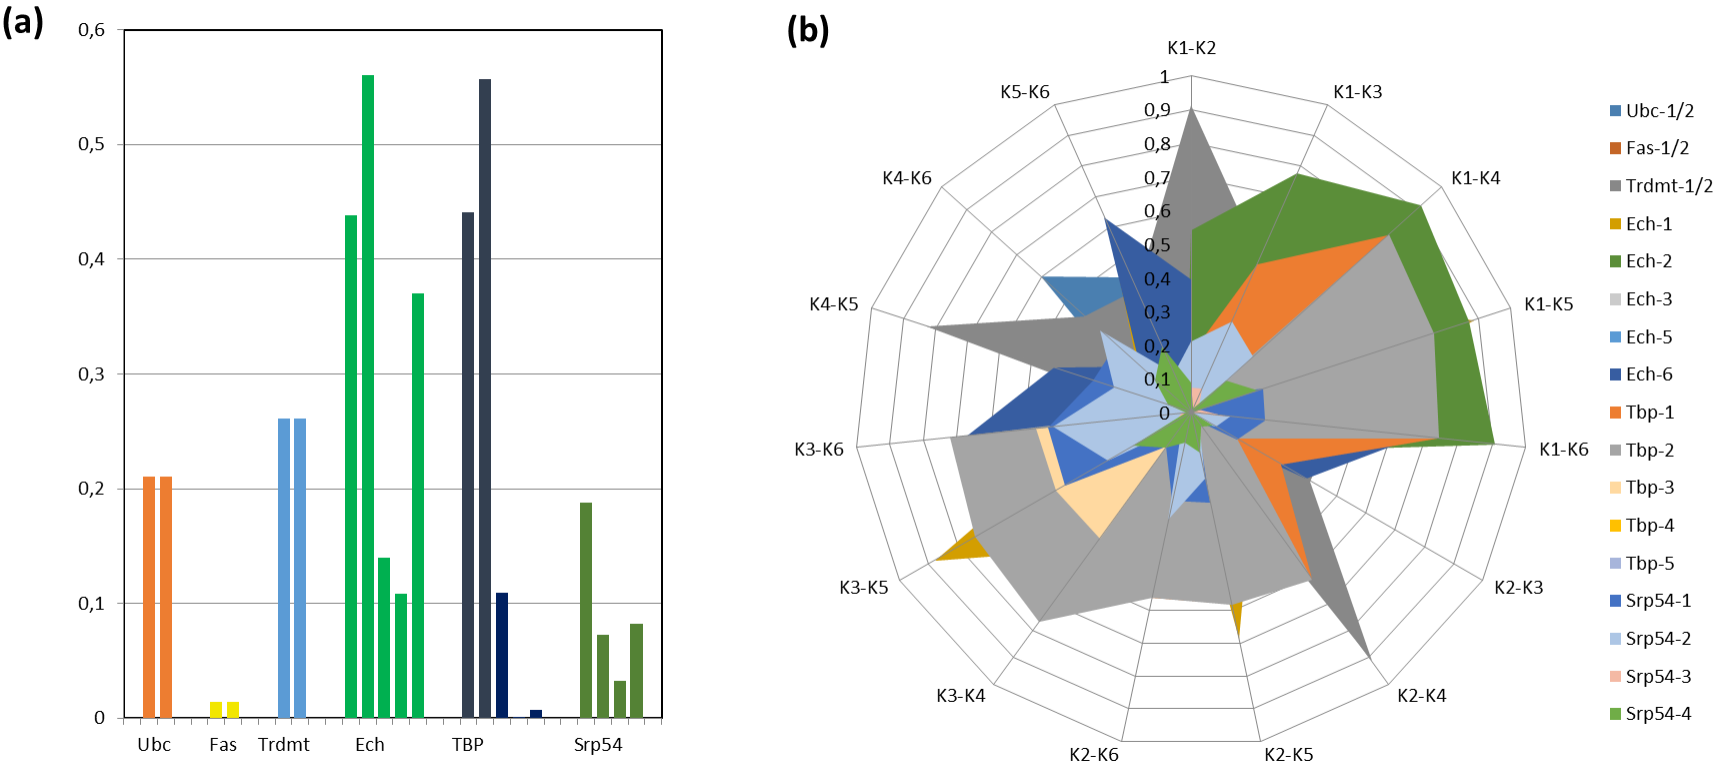

Supplement: s1 [file s1]
