# Supplementary material
Source: MDPI journal article supplement (https://www.mdpi.com/2673-1924/5/2/16)
Supplement: s1 [file s1]

Figure S1 – Examples of polymorphisms scored in agarose gels for the six introns employed in this study. SM: size marker.

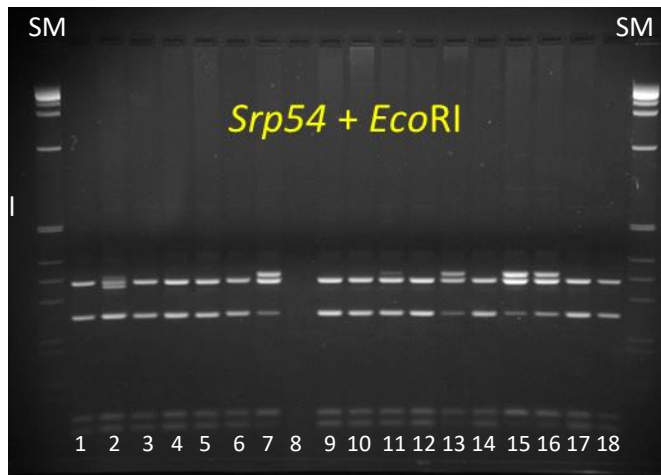

SRP54.- Lanes 1, 3-6,9-12, 14,17-18: homozygotes 2/2; lane 2: heterozygote 2/4; lanes 7, 13, 15 and 16: heterozygote 1/2

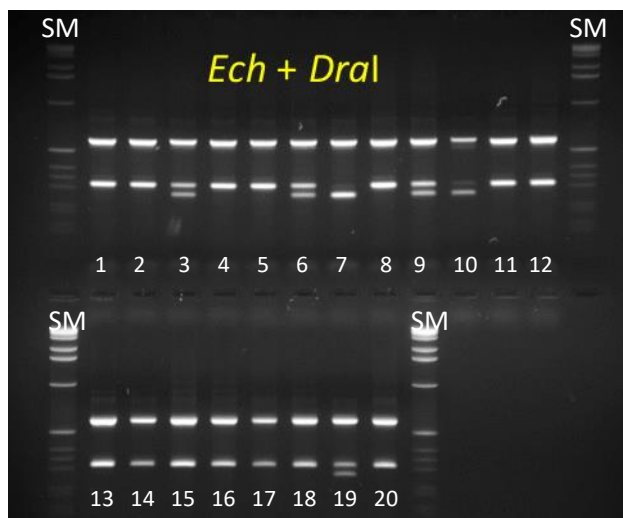

Ech.- Lanes 1-2, 4-5, 6,11-18 and 20: homozygote 1/1; lanes 3, 6, 9-10 and 19: heterozygotes 1/2 ; lane 7: homozygote 2/2

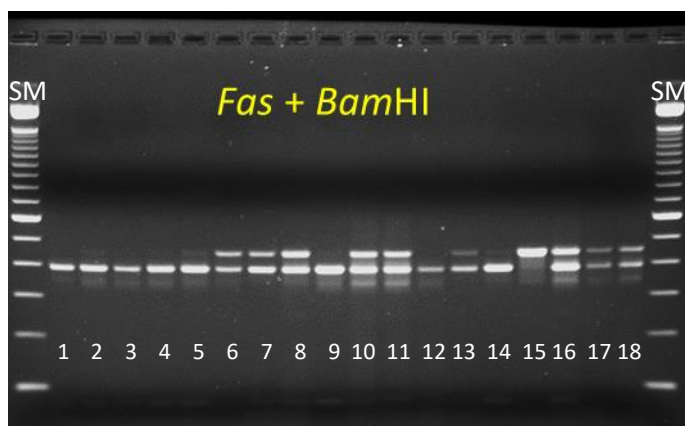

Fas.- Lanes 1-,5 9,12 and 14: homozygotes 1/1; lanes 6-8, 10-11, 13 and 16-18: heterozygotes 1/2; lane 15: homozygote 2/2

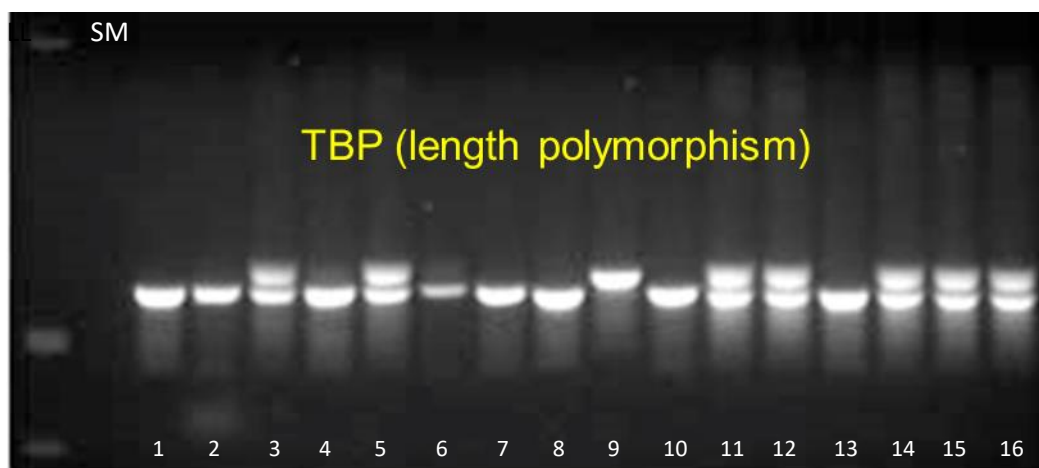

TBP.- Lanes 1-2, 4, 6-8, 10 and 13: homozygotes 2/2; lanes 3, 5, 11-12 and 14-16: heterozygotes 1/2 ; lane 9: homozygote 1/1

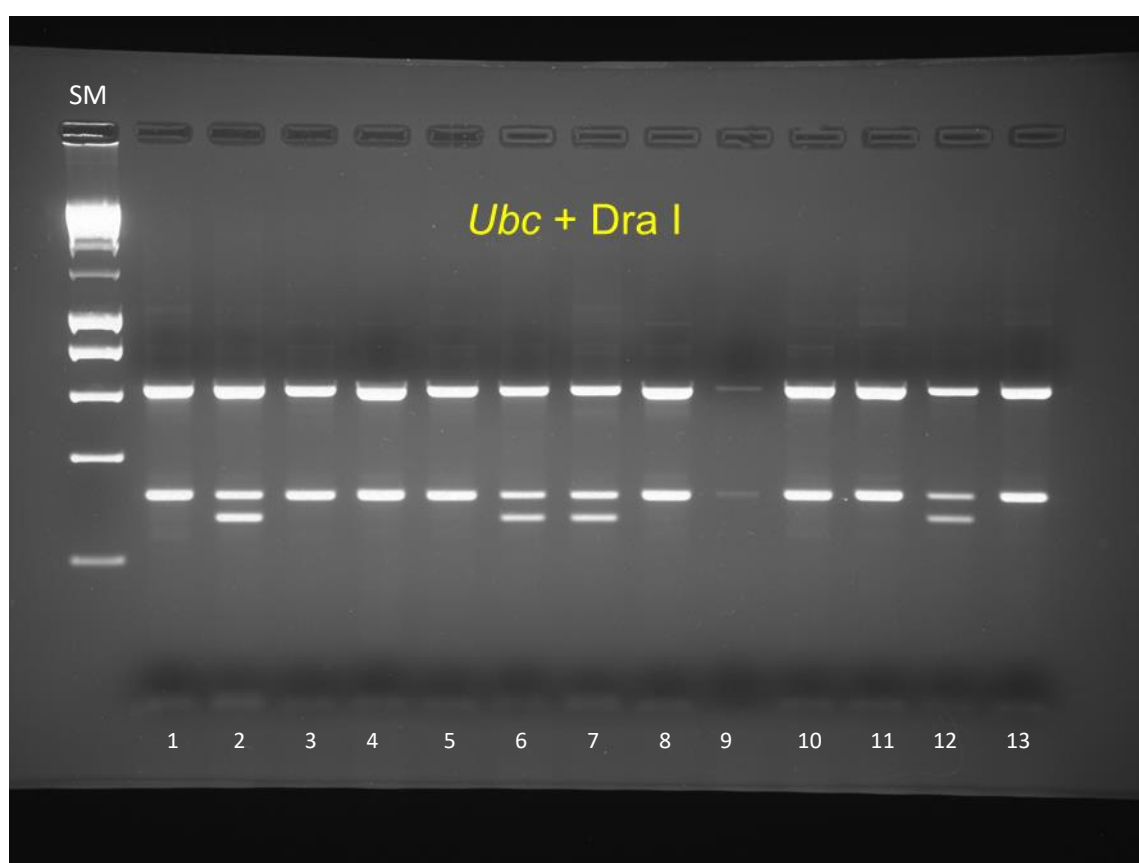

Ubc .- Lanes 1, 3-5, 8-11 and 13: homozygotes 1/1 ; lanes 2, 6-7 and 12, heterozygotes 1/2

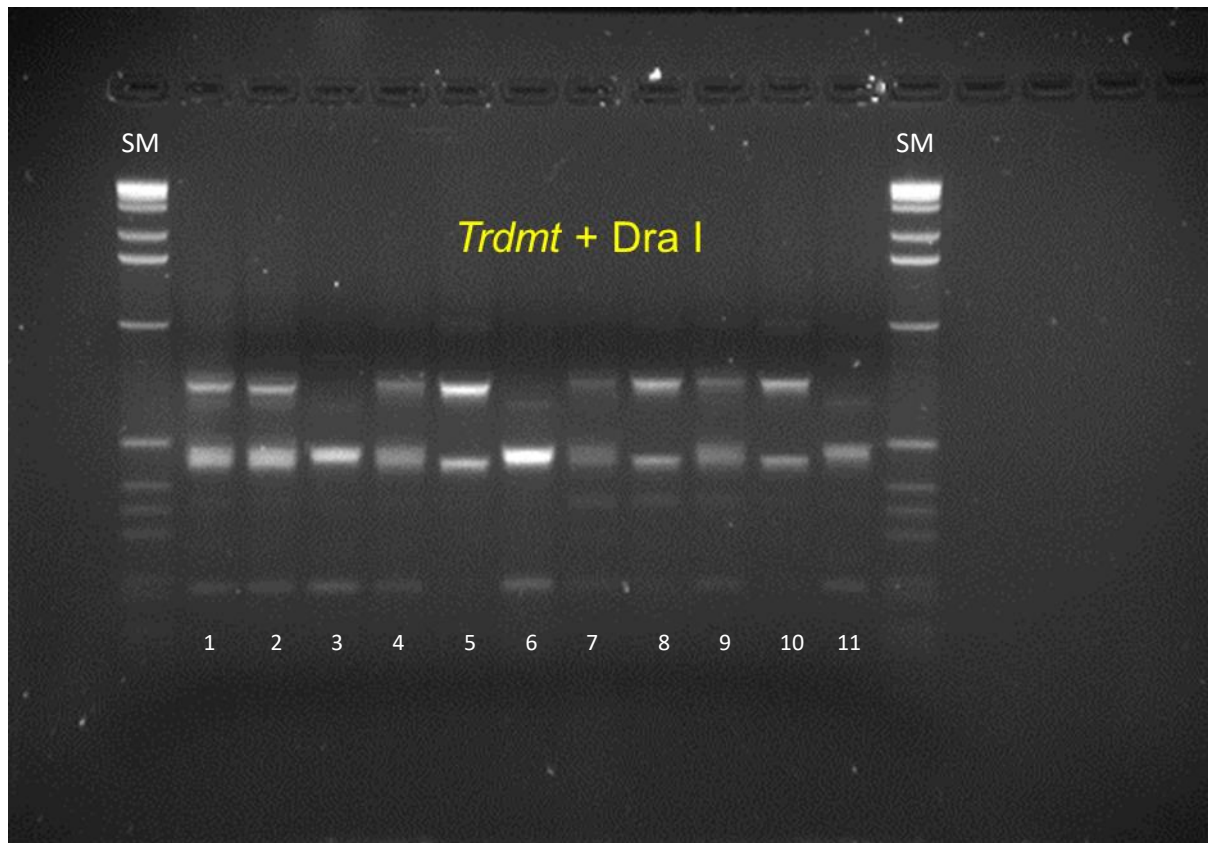

Trdmt.- Lanes 1-2, 4, 7 and 9: heterozygotes 1/2; lanes 3, 6 and 11: homozygotes 1/1 ; lanes 5, 8 and 10: homozygotes 2/2
